# Supplementary material for: Assessment of suitable habitat of Semen Armeniacae Amarum. in China under different climatic conditions by Internal Transcribed Spacer 2 and Maxent model
Source: Research Square preprint supplement (doi:10.21203/rs.3.rs-6054005/v1), 2025-04-15

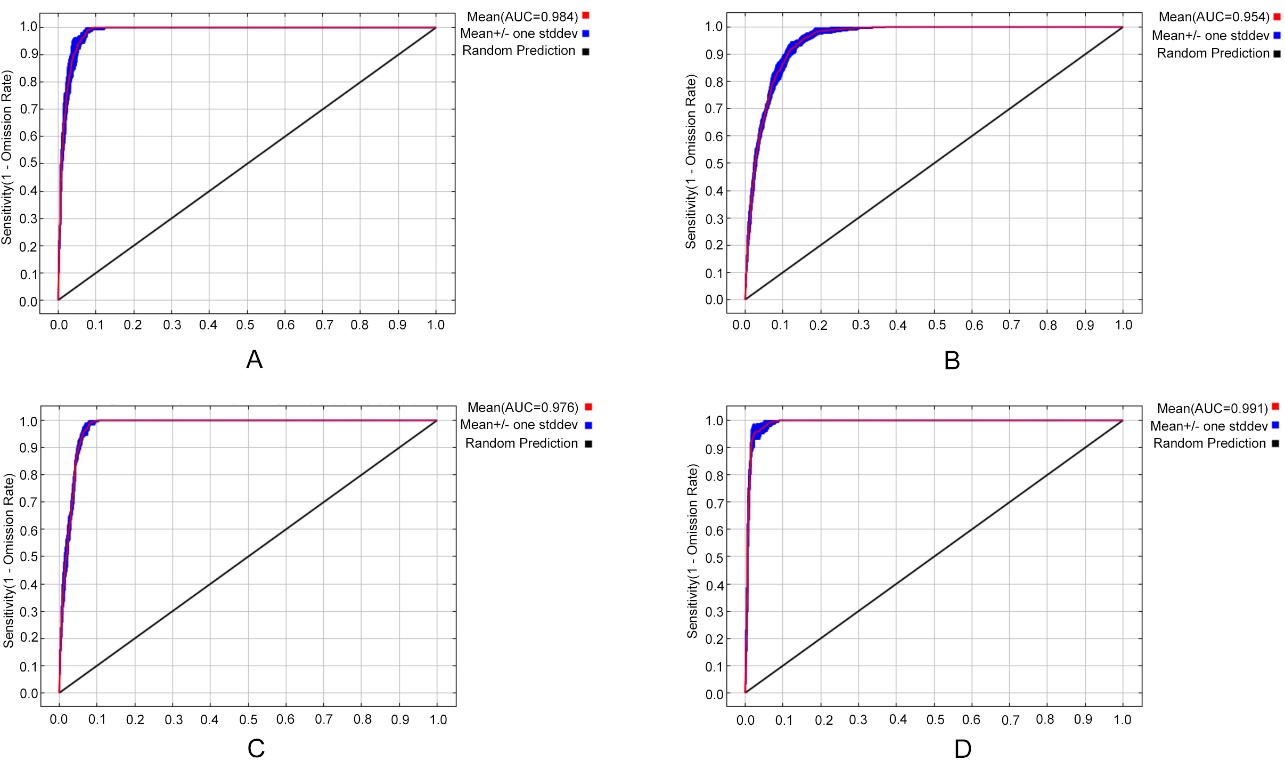


Fig. S1 AUC curve of ecological distribution

Table S1 The variable importance of key environmental factors of *Prunus armeniaca L.var.ansu Maxim.*

| Variable | Percent contribution (%) | | Permutation importance (%) | |
| --- | --- | --- | --- | --- |
| Bio 12 | | 45.1 | | 33.3 |
| Bio 14 | | 19.7 | | 15.9 |
| Bio 6 | | 16.5 | | 24.2 |
| Bio 10 | | 9.3 | | 1.3 |
| Bio 5 | | 5.2 | | 16.1 |
| Bio 3 | | 2.6 | | 3 |
| Bio 2 | | 1.6 | | 6.2 |


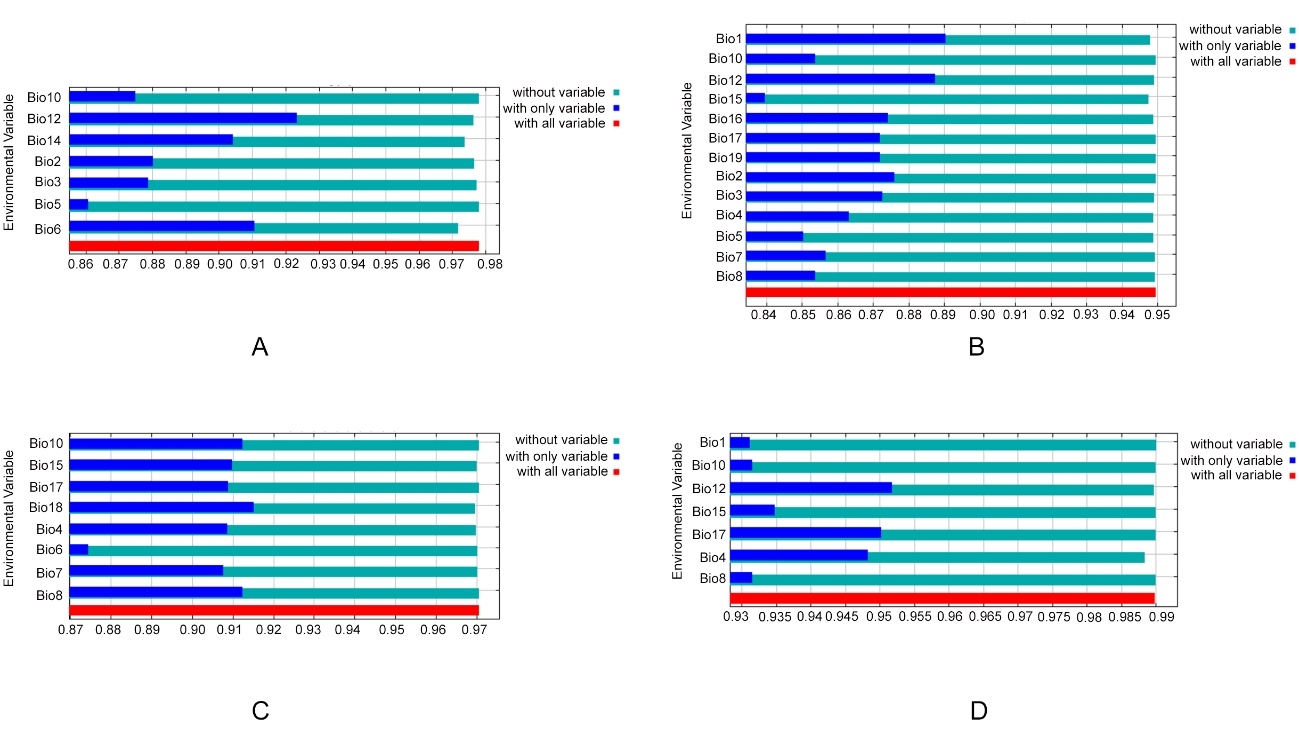


Fig. S2 Jackknife results of habitat distribution prediction

Table S2 The variable importance of key environmental factors of *Prunus armeniaca* L.

| Variable | Percent contribution (%) | | Permutation importance (%) | |
| --- | --- | --- | --- | --- |
| Bio 17 | | 35.6 | | 6 |
| Bio 5 | | 20.1 | | 16.2 |
| Bio 10 | | 13.7 | | 6.8 |
| Bio 1 | | 11.6 | | 28.7 |
| Bio 4 | | 5.7 | | 10.1 |
| Bio 12 | | 5 | | 4 |
| Bio 7 | | 3.4 | | 0.6 |
| Bio 15 | | 2 | | 6.1 |
| Bio 19 | | 0.9 | | 1.3 |
| Bio 3 | | 0.7 | | 5.1 |
| Bio 2 | | 0.7 | | 2.8 |
| Bio 16 | | 0.4 | | 7.5 |
| Bio 8 | | 0.3 | | 4.9 |

Table S3 The variable importance of key environmental factors of *Prunus sibirica* L.

| Variable | Percent contribution (%) | | Permutation importance (%) | |
| --- | --- | --- | --- | --- |
| Bio 18 | | 36.9 | | 19.4 |
| Bio 4 | | 36.1 | | 7.7 |
| Bio 15 | | 13.2 | | 35.5 |
| Bio 10 | | 6.4 | | 14.3 |
| Bio 6 | | 4.8 | | 7.1 |
| Bio 17 | | 1.2 | | 6.2 |
| Bio 7 | | 0.8 | | 5.7 |
| Bio 8 | | 0.6 | | 4.2 |

Table S4 The variable importance of key environmental factors of *Prunus mandshurica* (Maxim.) Koehne.

| Variable | Percent contribution (%) | | Permutation importance (%) | |
| --- | --- | --- | --- | --- |
| Bio 4 | | 43.2 | | 3.9 |
| Bio 12 | | 27.6 | | 4.3 |
| Bio 17 | | 17.8 | | 11.8 |
| Bio 1 | | 8.3 | | 43.1 |
| Bio 10 | | 1.6 | | 23.7 |
| Bio 15 | | 1.4 | | 5.7 |
| Bio 8 | | 0.3 | | 7.6 |

Table S5 Areas of suitable habitat for *Prunus armeniaca* L. var. ansu Maxim. based on current and future climate conditions.

| *Prunus armeniaca* L. var. ansu Maxim. | Highly suitable area/×106 km2 | | Moderately suitable area/×106 km2 | | Poorly suitable area/×106 km2 | | Suitable area  /×106 km2 | |
| --- | --- | --- | --- | --- | --- | --- | --- | --- |
| Current | | 0.209 | | 0.456 | | 0.525 | | 1.190 |
| RCP2.6-2050s | | 0.180 | | 0.470 | | 0.577 | | 1.227 |
| RCP2.6-2070s | | 0.207 | | 0.490 | | 0.534 | | 1.231 |
| RCP4.5-2050s | | 0.133 | | 0.461 | | 0.570 | | 1.164 |
| RCP4.5-2070s | | 0.166 | | 0.408 | | 0.526 | | 1.100 |
| RCP8.5-2050s | | 0.182 | | 0.481 | | 0.572 | | 1.235 |
| RCP8.5-2070s | | 0.218 | | 0.449 | | 0.511 | | 1.178 |

Table S6 Areas of suitable habitat for *Prunus armeniaca* L. based on current and future climate conditions.

| *Prunus armeniaca* L. | Highly suitable area/×106 km2 | | Moderately suitable area/×106 km2 | | Poorly suitable area/×106 km2 | | Suitable area  /×106 km2 | |
| --- | --- | --- | --- | --- | --- | --- | --- | --- |
| Current | | 0.446 | | 0.9276 | | 1.408 | | 2.7816 |
| RCP2.6-2050s | | 0.4045 | | 0.7613 | | 1.283 | | 2.4488 |
| RCP2.6-2070s | | 0.413 | | 0.747 | | 1.3508 | | 2.5108 |
| RCP4.5-2050s | | 0.425 | | 0.717 | | 1.306 | | 2.448 |
| RCP4.5-2070s | | 0.4123 | | 0.772 | | 1.4138 | | 2.5981 |
| RCP8.5-2050s | | 0.404 | | 0.761 | | 1.283 | | 2.448 |
| RCP8.5-2070s | | 0.3943 | | 0.7964 | | 1.3317 | | 2.5224 |

Table S7 Areas of suitable habitat for *Prunus sibirica* L. based on current and future climate conditions.

| *Prunus sibirica* L. | Highly suitable area/×106 km2 | | Moderately suitable area/×106 km2 | | Poorly suitable area/×106 km2 | | Suitable area  /×106 km2 | |
| --- | --- | --- | --- | --- | --- | --- | --- | --- |
| Current | | 0.138 | | 0.670 | | 0.890 | | 1.698 |
| RCP2.6-2050s | | 0.185 | | 0.627 | | 0.771 | | 1.583 |
| RCP2.6-2070s | | 0.197 | | 0.539 | | 0.683 | | 1.419 |
| RCP4.5-2050s | | 0.186 | | 0.650 | | 0.745 | | 1.581 |
| RCP4.5-2070s | | 0.197 | | 0.552 | | 0.815 | | 1.564 |
| RCP8.5-2050s | | 0.192 | | 0.574 | | 0.770 | | 1.536 |
| RCP8.5-2070s | | 0.243 | | 0.591 | | 0.876 | | 1.710 |

Table S8 Areas of suitable habitat for *Prunus mandshurica* (Maxim.) Koehne based on current and future climate conditions.

| *Prunus mandshurica* (Maxim.) Koehne | Highly suitable area/×106 km2 | | Moderately suitable area/×106 km2 | | Poorly suitable area/×106 km2 | | Suitable area  /×106 km2 | |
| --- | --- | --- | --- | --- | --- | --- | --- | --- |
| Current | | 0.109 | | 0.167 | | 0.152 | | 0.428 |
| RCP2.6-2050s | | 0.118 | | 0.170 | | 0.171 | | 0.459 |
| RCP2.6-2070s | | 0.099 | | 0.182 | | 0.185 | | 0.466 |
| RCP4.5-2050s | | 0.118 | | 0.177 | | 0.170 | | 0.465 |
| RCP4.5-2070s | | 0.113 | | 0.185 | | 0.155 | | 0.453 |
| RCP8.5-2050s | | 0.120 | | 0.173 | | 0.160 | | 0.453 |
| RCP8.5-2070s | | 0.136 | | 0.162 | | 0.156 | | 0.454 |

Fig. S3 The regression model linking amygdalin content to environmental factors


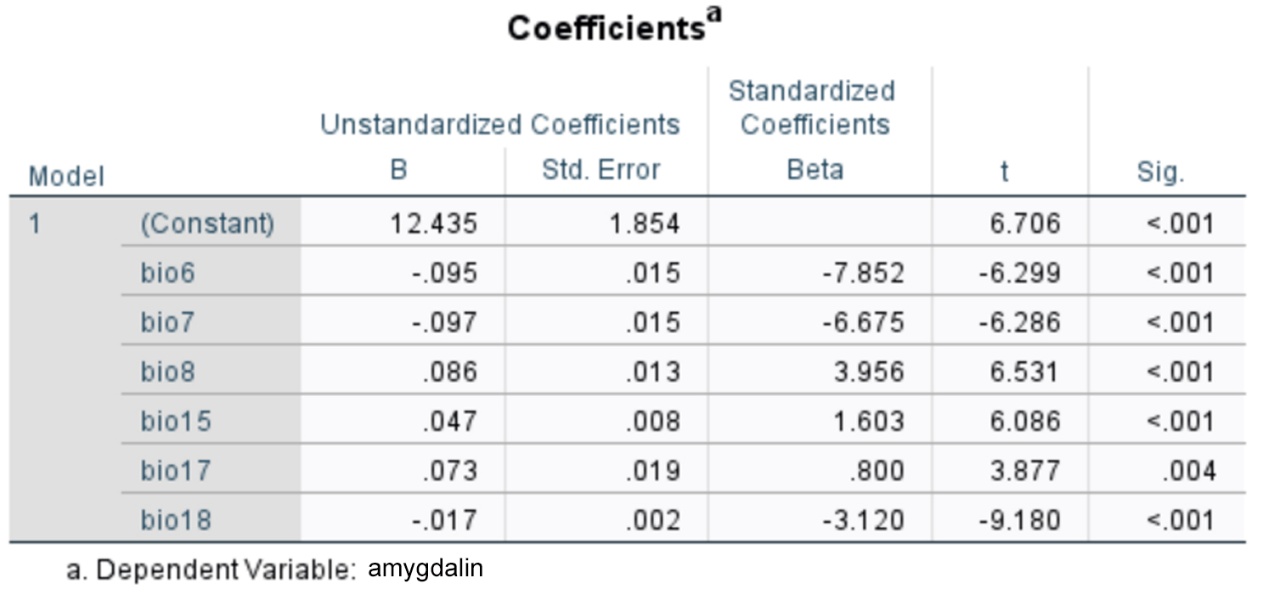

Supplement: Supplementary file 1 [file e04a3890cfb1307238653393.docx]
